# Supplementary material
Source: publisher site journal article supplement (https://www.spandidos-publications.com/4500/downloadSupplementary)

Figure S1. Olaparib sensitivity evaluation of five breast cancer cell lines. (A) Apoptosis ratio of the five breast cancer cell lines (MDA-MB-453, MDA-MB-231, MCF7, BT-549 and HCC1599) after treatment with olaparib (The concentration used is 50  $\mu$ M) for 24 h. (B) The Western blot analysis results for apoptosis-related protein (pro-caspase-3, cleaved-caspase-3, BAX and BCL-2) in the five cell lines. Kruskal-Wallis test followed by Newman-Keuls test were utilized to determine the statistical significance. The experiments were performed in triplicate and mean values were compared. The cleaved/pro-caspase-3 ratio was also been counted. No significant difference in the ratio was observed among the cell lines. The lowest apoptosis ratio was detected in MDA-MB-453 and the apoptosis of other cell lines were compared to it (\* $P < 0.05$ ).

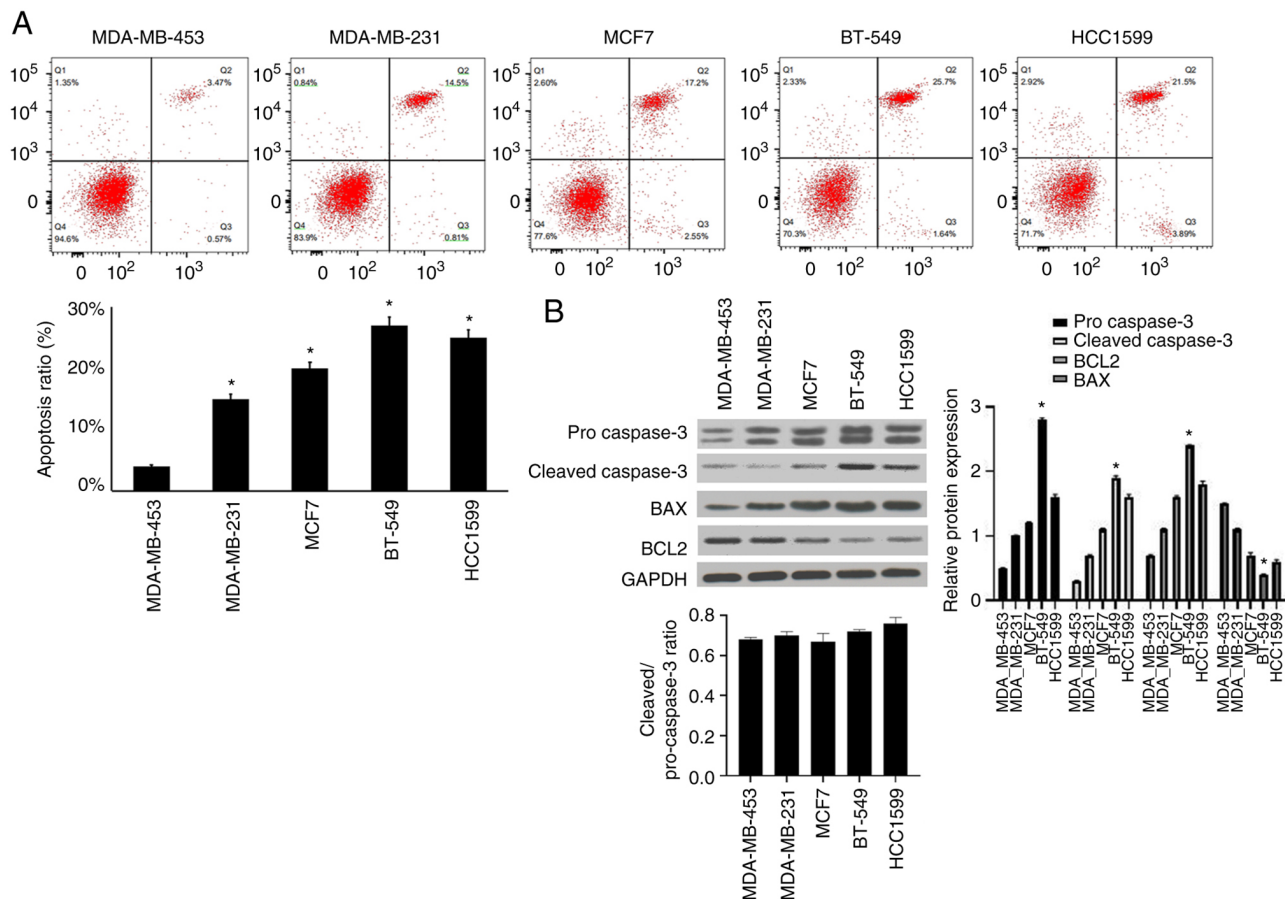

Supplement: Supplementary file 1 [file downloadSupplementary]
